# Supplementary material
Source: PubMed Central journal article supplement (PMC7479950)
Supplement: advancesADV2020002098-suppl1.pdf [file advancesADV2020002098-suppl1.pdf]

## Supplemental Figures

### Supplemental Figure 1. IHC in cHL.

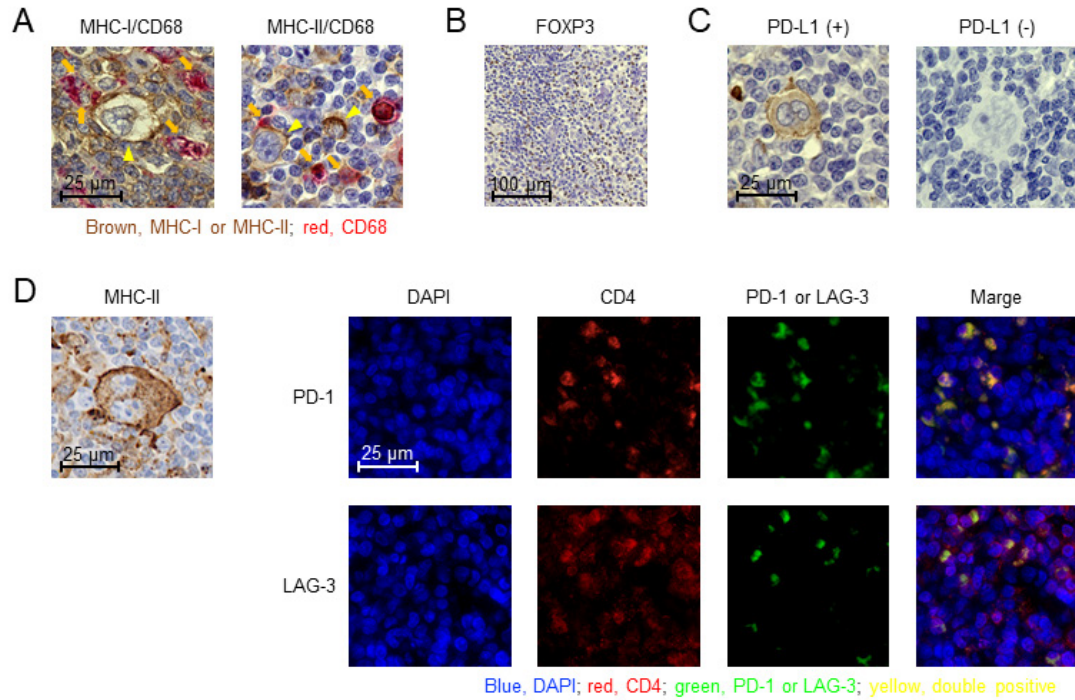

IHC was conducted using FFPE sections (3  $\mu$ m). **(A)** Double staining for MHC-I or MHC-II and CD68. To discriminate HRS cells from macrophages, we co-stained MHC-I or MHC-II (brown) and CD68 (red). Representative staining pictures are shown. Yellow arrows, HRS cells; orange arrows, MHC<sup>+</sup>CD68<sup>+</sup> cells. **(B and C)** FOXP3 and PD-L1 staining. Representative staining pictures for FOXP3 **(B)** and PD-L1 **(C, left: positive, right: negative)** are shown. **(D)** Multiplex fluorescent IHC for CD4 and PD-1 or LAG-3. MHC-II staining (left) and multiplex fluorescent CD4 (red) and PD-1 or LAG-3 (green) staining pictures (right) in a patient are shown.

**Supplemental Figure 2. MHC expression in each tumor cell line.**

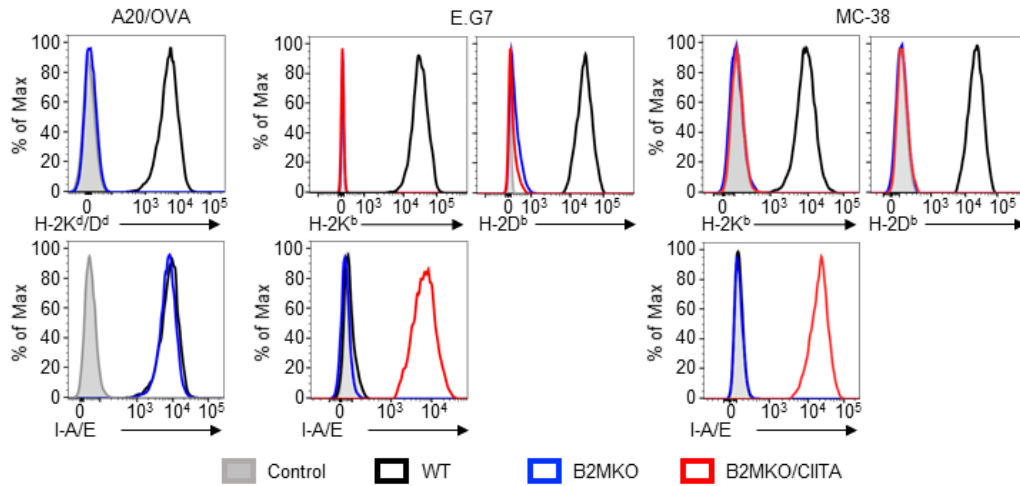

The expression of MHC-I and MHC-II was analyzed after treatment with IFN- $\gamma$  (1,000 IU/mL) with flow cytometry. Representative data from three independent experiments are shown. Gray, control; black, wild-type cell lines (WT); blue, *B2M*-knockout cell lines (B2MKO); red, *B2MKO*-knockout and *CIITA*-overexpressing cell lines (B2MKO/CIITA).

**Supplemental Figure 3. *In vivo* antitumor efficacy of anti-PD-1 mAb against E.G7 or MC-38 tumors.**

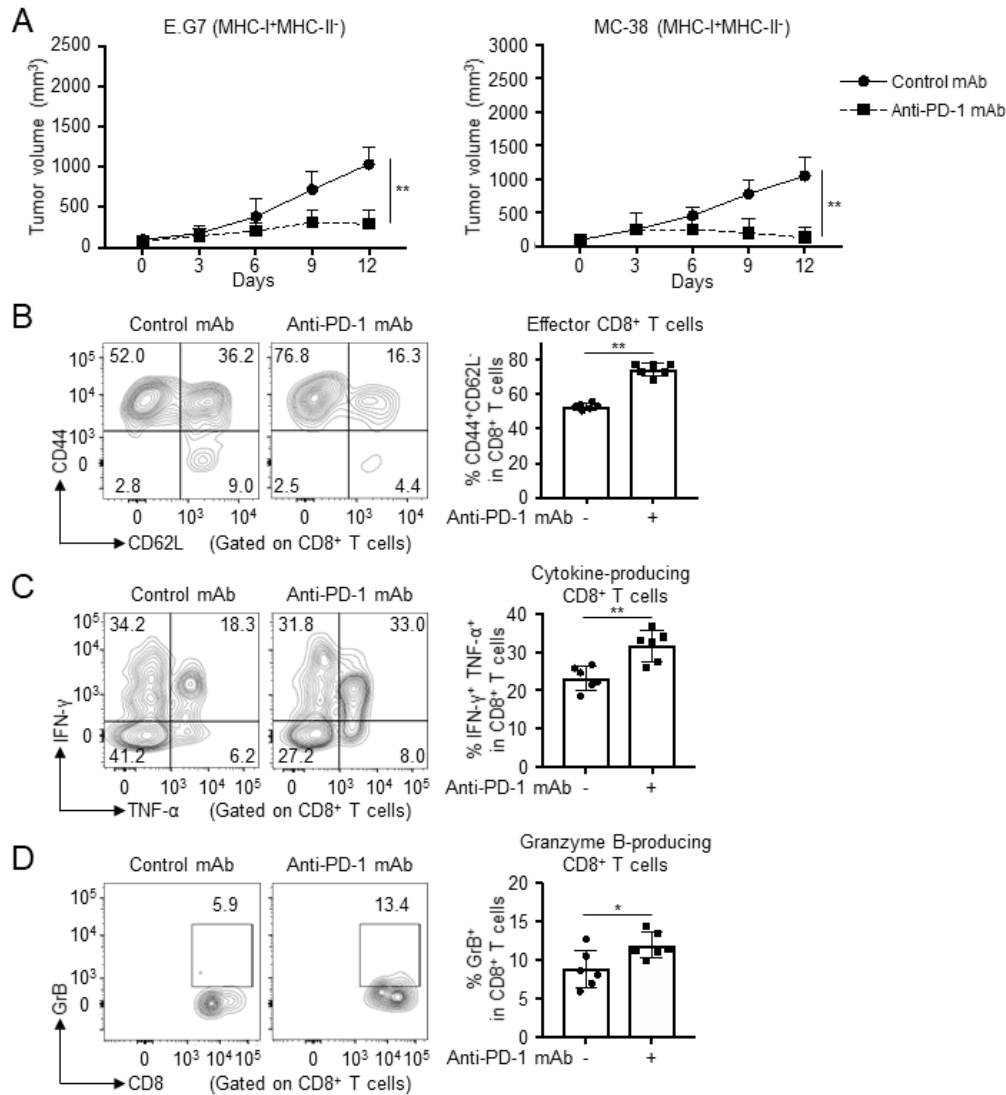

**(A).** *In vivo* antitumor efficacy of anti-PD-1 mAb against E.G7 or MC-38 tumors. E.G7 ( $5.0 \times 10^6$ ) or MC-38 ( $1.0 \times 10^6$ ) cells were inoculated subcutaneously. Mice were grouped when the tumors reached approximately 100 mm<sup>3</sup> (day 0), and anti-PD-1 mAb was administered on days 0, 3, and 6 (n = 6 per group). Tumor growth was monitored every 3 days. Circle, control Ab; square, anti-PD-1 mAb. **(B-D)** TILs were prepared from E.G7 tumors 14 days after tumor inoculation, and the frequencies of CD44<sup>+</sup>CD62L<sup>-</sup> effector/memory CD8<sup>+</sup> T cells **(B)**, TNF-α<sup>+</sup>IFN-γ<sup>+</sup>CD8<sup>+</sup> T cells **(C)**, and GrB<sup>+</sup>CD8<sup>+</sup> T cells **(D)** were analyzed with flow cytometry. Representative staining (left) and summaries for the frequency of each cell population (right) are shown. All *in vivo* experiments were performed twice with similar results. Circle, control Ab; square, anti-PD-1 mAb; \*,  $P < 0.05$ ; \*\*,  $P < 0.01$ .

**Supplemental Figure 4. The frequencies of CD44<sup>+</sup>CD62L<sup>-</sup> effector/memory CD8<sup>+</sup> T cells, TNF- $\alpha$ <sup>+</sup>IFN- $\gamma$ <sup>+</sup>CD8<sup>+</sup> T cells, and GrB<sup>+</sup>CD8<sup>+</sup> T cells in the TIL population from E.G7/B2MKO tumors.**

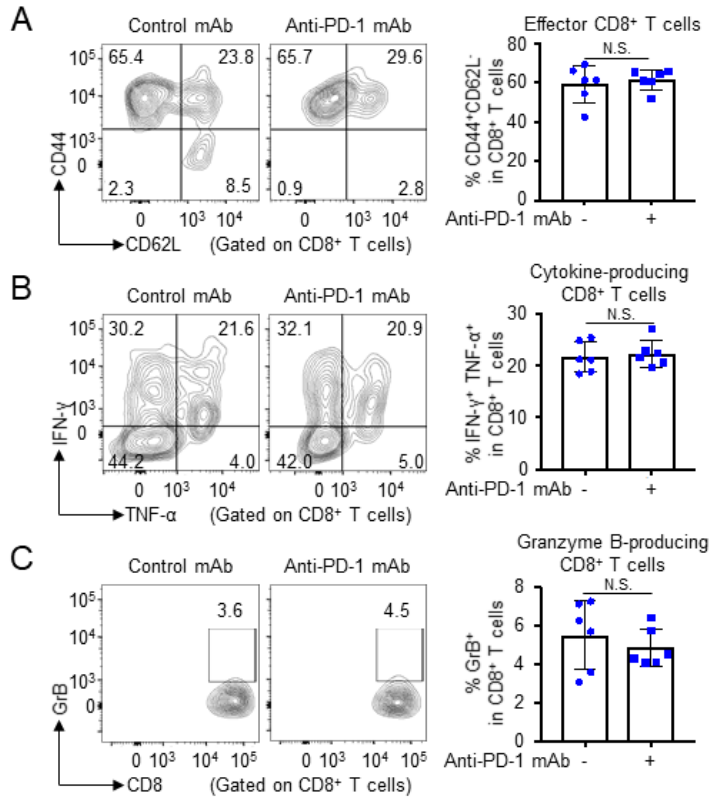

(A-C) E.G7/B2MKO cells ( $5.0 \times 10^6$ ) were inoculated subcutaneously. Mice were grouped when the tumors reached approximately 100 mm<sup>3</sup> (day 0), and anti-PD-1 mAb was administered on days 0, 3, and 6 (n = 6 per group). TILs were prepared from tumors 14 days after tumor inoculation, and the frequencies of CD44<sup>+</sup>CD62L<sup>-</sup> effector/memory CD8<sup>+</sup> T cells (A), TNF- $\alpha$ <sup>+</sup>IFN- $\gamma$ <sup>+</sup>CD8<sup>+</sup> T cells (B), and GrB<sup>+</sup>CD8<sup>+</sup> T cells (C) in the TIL population were analyzed with flow cytometry. Representative staining (left) and summaries for the frequency of each cell population (right) are shown. All *in vivo* experiments were performed twice with similar results. Circle, control mAb; square, anti-PD-1 mAb; N.S., not significant.

**Supplemental Figure 5. Survival of cHL patients stratified according to CD8<sup>+</sup> T cell infiltration, FOXP3<sup>+</sup> regulatory T cell infiltration, MHC-I expression, MHC-II expression and PD-L1 expression.**

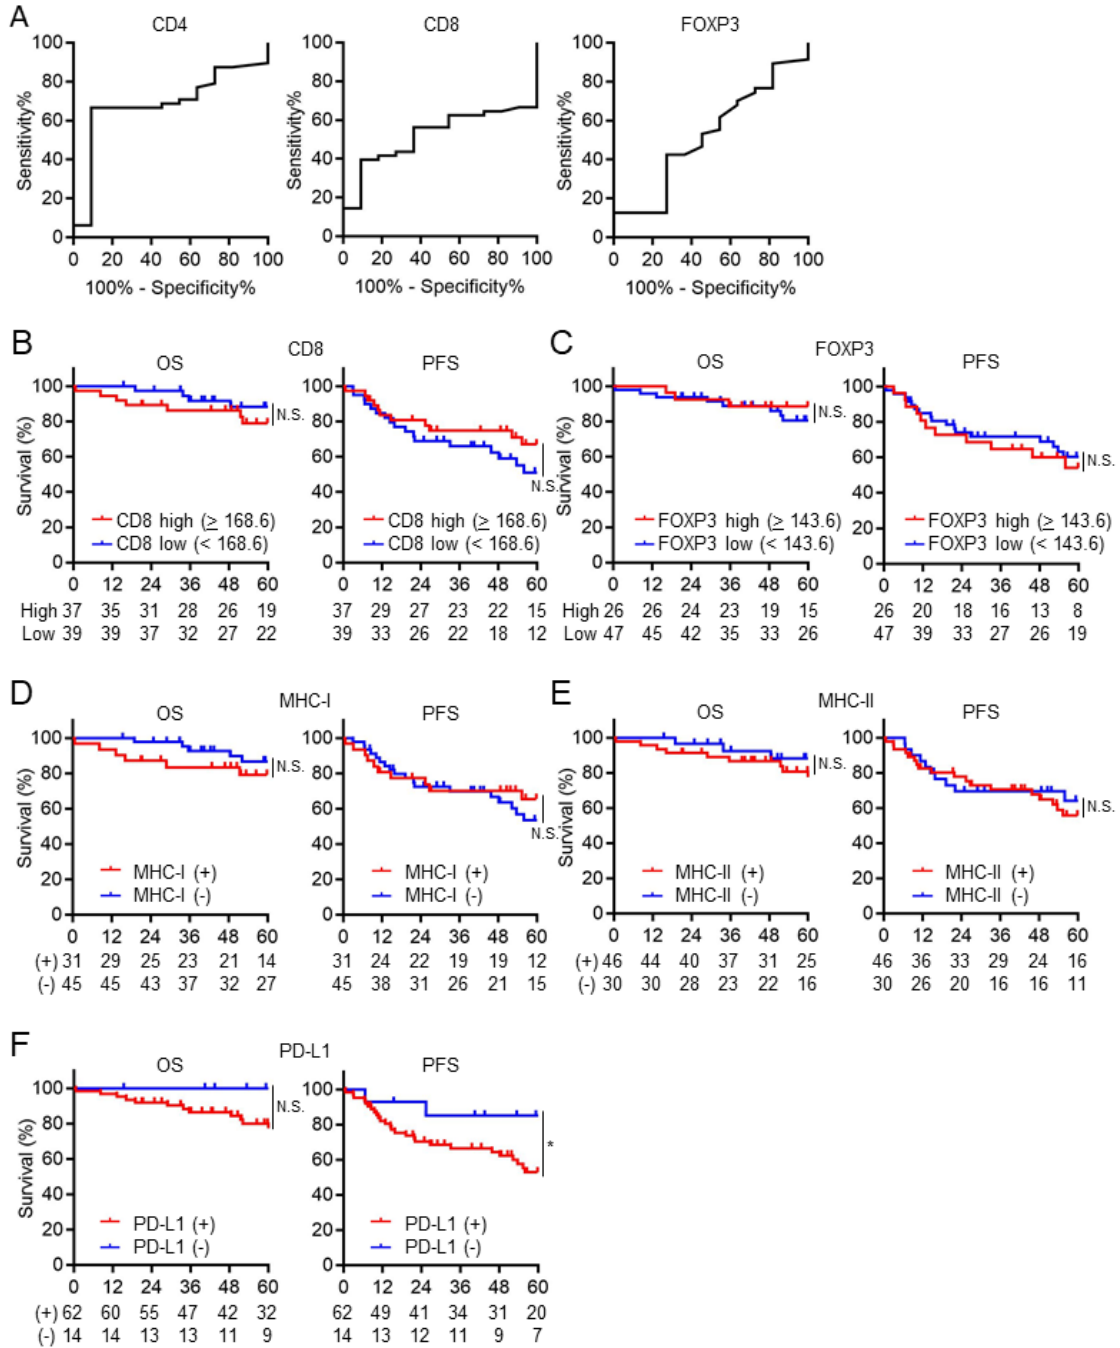

(A) ROC curves. The survival of 76 cHL patients who received first-line standard chemotherapy (adriamycin, bleomycin, vinblastine, and dacarbazine) was examined. We employed 5-year survival for ROC curves. ROC curves for CD4 (left), CD8 (middle), or FOXP3 (right) are shown. (B-F) OS and PFS. The cohort was divided by each cut-off

value (CD8 high,  $\geq 168.6$  vs. low,  $< 168.6$  and FOXP3 high,  $\geq 143.6$  vs. low,  $< 143.6$ ) determined by the ROC curves. OS (left) and PFS (right) according to IHC for CD8 (**B**), FOXP3 (**C**), MHC-I (**D**), or MHC-II (**E**), or PD-L1 (**F**) are shown. N.S., not significant; \*,  $P < 0.05$ .

**Supplemental Figure 6. *In vivo* antitumor efficacy of anti-LAG-3 mAb against E.G7 or MC-38 tumors.**

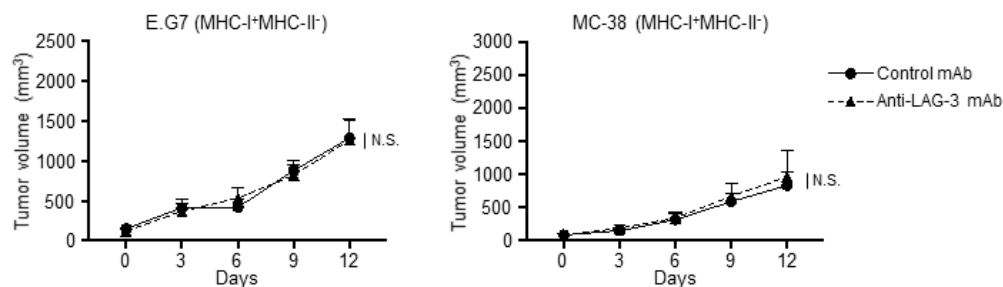

E.G7 (left;  $5.0 \times 10^6$ ) or MC-38 (right;  $1.0 \times 10^6$ ) cells were inoculated subcutaneously. Mice were grouped when the tumors reached approximately  $100 \text{ mm}^3$  (day 0), and anti-LAG-3 mAb was administered on days 0, 3, and 6 ( $n = 6$  per group). Tumor growth was monitored every 3 days. All *in vivo* experiments were performed twice with similar results. Circle, control mAb; triangle, anti-LAG-3 mAb; N.S., not significant.

**Supplemental Figure 7. The frequencies of CD44<sup>+</sup>CD62L<sup>-</sup> effector/memory CD4<sup>+</sup> T cells, TNF- $\alpha$ <sup>+</sup>IFN- $\gamma$ <sup>+</sup>CD4<sup>+</sup> T cells, and GrB<sup>+</sup>CD4<sup>+</sup> T cells in the TIL population of E.G7/B2MKO/CIITA tumors.**

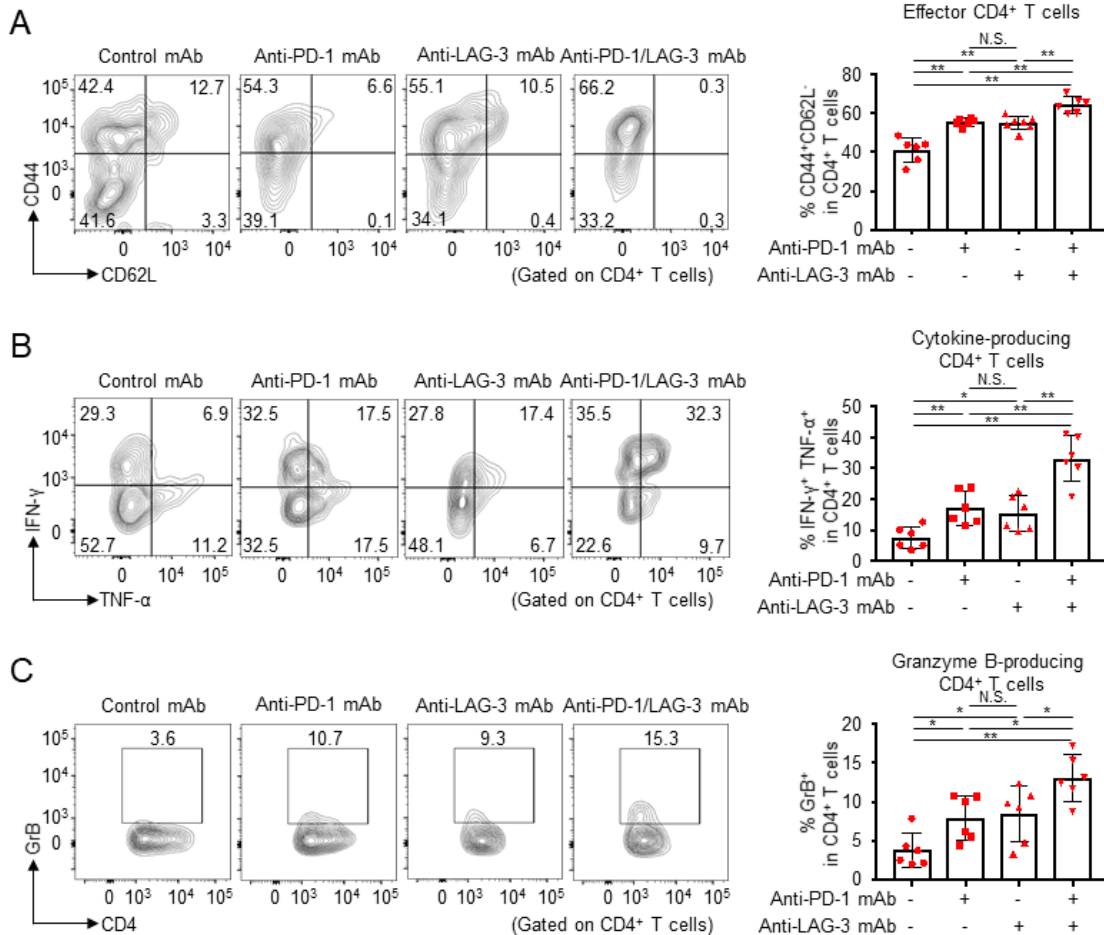

(A-C) Tumor cells ( $1.0 \times 10^6$ ) were inoculated subcutaneously. Mice were grouped when the tumors reached approximately  $100 \text{ mm}^3$  (day 0), and ICIs were administered on days 0, 3, and 6 ( $n = 6$  per group). TILs were prepared from E.G7/B2MKO/CIITA tumors 14 days after tumor inoculation, and the frequencies of CD44<sup>+</sup>CD62L<sup>-</sup> effector/memory CD4<sup>+</sup> T cells (A), TNF- $\alpha$ <sup>+</sup>IFN- $\gamma$ <sup>+</sup>CD4<sup>+</sup> T cells (B), and GrB<sup>+</sup>CD4<sup>+</sup> T cells (C) in the TIL population were analyzed with flow cytometry. Representative staining (left) and summaries for the frequency of each cell population (right) are shown. All *in vivo* experiments were performed twice with similar results. Circle, control mAb; square, anti-PD-1 mAb; triangle, anti-LAG-3 mAb; inverted triangle, combination of anti-PD-1 mAb and anti-LAG-3 mAb; N.S., not significant; \*,  $P < 0.05$ ; \*\*,  $P < 0.01$ .



**Supplemental Table 1. Summary of the antibodies used in flow cytometry analyses.**

| <b>Molecule</b>                       | <b>Clone</b> | <b>Tag</b>  | <b>Company</b>           |
|---------------------------------------|--------------|-------------|--------------------------|
| <b>CD3</b>                            | 17A2         | AF700       | Biolegend                |
| <b>CD8</b>                            | 53-6.7       | V500        | BD Biosciences           |
| <b>CD4</b>                            | RM4-5        | BV786       | BD Biosciences           |
| <b>CD44</b>                           | IM7          | PE-Cy7      | BD Biosciences           |
| <b>CD62L</b>                          | MEL-14       | PerCP-Cy5.5 | Biolegend                |
| <b>IFN-<math>\gamma</math></b>        | XMG1.2       | APC         | BD Biosciences           |
| <b>TNF-<math>\alpha</math></b>        | MP6-XT22     | BV421       | Biolegend                |
| <b>GrB</b>                            | NGZB         | PE-Cy7      | Thermo Fisher Scientific |
| <b>I-A/E</b>                          | M5/114.15.2  | AF488       | Biolegend                |
| <b>H-2K<sup>b</sup></b>               | AF6-88.5     | PE          | Biolegend                |
| <b>H-2L<sup>d</sup>/D<sup>b</sup></b> | 28-14-8      | PE          | Biolegend                |
| <b>H-2K<sup>d</sup>/D<sup>d</sup></b> | 34-1-2S      | APC         | Biolegend                |

**Supplemental Table 2. Clinicopathological features in relation to CD4<sup>+</sup> T cell infiltration.**

| Features                        | CD4                   |                   | P        |
|---------------------------------|-----------------------|-------------------|----------|
|                                 | High, $\geq 425$ (46) | Low, $< 425$ (39) |          |
| Age [median] (range)            | 44 (15-81)            | 52 (15-88)        | 0.081    |
| <b>Sex</b>                      |                       |                   |          |
| Male/female                     | 35/11                 | 23/14             | 0.24     |
| <b>Sampling</b>                 |                       |                   |          |
| 1st diagnosis/relapse           | 44/2                  | 36/3              | 0.66     |
| <b>Histology</b>                |                       |                   |          |
| NS/MC/others                    | 16/22/8               | 20/17/2           | 0.36¶    |
| <b>EBV</b>                      |                       |                   |          |
| Positive/negative               | 16/14                 | 14/15             | 0.80     |
| <b>Performance status</b>       |                       |                   |          |
| 0 or 1/2 or 3                   | 46/0                  | 37/2              | 0.21     |
| <b>Ann Arbor stage</b>          |                       |                   |          |
| I or II/III or IV               | 23/23                 | 16/23             | 0.51     |
| <b>B symptom</b>                |                       |                   |          |
| Yes/no                          | 13/33                 | 12/27             | 0.82     |
| <b>LDH [median U/L] (range)</b> | 229.5 (68-554)        | 205 (122-410)     | 0.34     |
| <b>MHC class I</b>              |                       |                   |          |
| Positive/negative               | 18/28                 | 18/21             | 0.66     |
| <b>MHC class II</b>             |                       |                   |          |
| Positive/negative               | 37/9                  | 17/22             | $< 0.01$ |
| <b>CD8 [median] (range)</b>     | 140.7 (11-400)        | 187.4 (6.2-437.4) | 0.64     |
| <b>FOXP3 [median] (range)</b>   | 93.8 (11-568.6)       | 100 (6.4-368.6)   | 0.22     |
| <b>PD-L1</b>                    |                       |                   |          |
| Positive/negative               | 37/9                  | 34/5              | 0.56     |
| <b>Best response to ABVD</b>    |                       |                   |          |
| CR/PR, SD, or PD                | 36/5                  | 24/11             | 0.051    |

NS, Nodular sclerosis; MC, Mixed cellularity; ABVD, adriamycin, bleomycin, vinblastine, and dacarbazine; CR, complete response; PR, partial response; SD, stable disease; PD, progressive disease.

¶, NS vs. MC

**Supplemental Table 3. Univariate and multivariate analyses for OS.**

| Features                            | Univariate |            |          | Multivariate |            |          |
|-------------------------------------|------------|------------|----------|--------------|------------|----------|
|                                     | HR         | 95% CI     | <i>P</i> | HR           | 95% CI     | <i>P</i> |
| Age (< 45/≥ 45 years)               | < 0.01     | -0.11      | < 0.01   | < 0.01       | -0.17      | < 0.01   |
| Sex (female/male)                   | 1.28       | 0.44-3.41  | 0.63     |              |            |          |
| Histology (the others/MC)           | 0.50       | 0.17-1.35  | 0.17     |              |            |          |
| EBV (negative/positive)             | 0.51       | 0.16-1.48  | 0.22     |              |            |          |
| Performance status (0 or 1/2 or 3)  | 0.075      | 0.019-0.49 | 0.012    | 0.36         | 0.085-2.45 | 0.25     |
| Ann Arbor stage (I or II/III or IV) | 0.23       | 0.052-0.70 | < 0.01   | 0.30         | 0.069-0.97 | 0.044    |
| B symptom (no/yes)                  | 0.52       | 0.20-1.39  | 0.19     |              |            |          |
| LDH (≤ upper limit/> upper limit)   | 0.62       | 0.23-1.75  | 0.35     |              |            |          |
| MHC class I (positive/negative)     | 1.39       | 0.52-3.65  | 0.50     |              |            |          |
| MHC class II (positive/negative)    | 1.36       | 0.50-4.31  | 0.56     |              |            |          |
| CD4 (high/low)                      | 0.18       | 0.049-0.51 | < 0.01   | 0.26         | 0.072-0.79 | 0.016    |
| CD8 (high/low)                      | 1.47       | 0.56-4.07  | 0.43     |              |            |          |
| FOXP3 (high/low)                    | 0.52       | 0.15-1.48  | 0.23     |              |            |          |
| PD-L1 (positive/negative)           | 3.63       | 0.74-65.61 | 0.13     |              |            |          |

**Supplemental Table 4. Clinical characteristics of 3 patients who received anti-PD-1 mAb.**

| <b>Case</b>               | <b>CCC-43</b>     | <b>CCC-66</b>     | <b>NCCHE-24</b>   |
|---------------------------|-------------------|-------------------|-------------------|
| <b>Age</b>                | 64                | 56                | 58                |
| <b>Sex</b>                | Male              | Male              | Male              |
| <b>Histology</b>          | Mixed cellularity | Mixed cellularity | Mixed cellularity |
| <b>EBV</b>                | Positive          | Positive          | Positive          |
| <b>Performance status</b> | 3                 | 0                 | 2                 |
| <b>Treatment line</b>     | 4th               | 4th               | 4th               |
| <b>Treatment</b>          | Nivolumab         | Nivolumab         | Nivolumab         |
| <b>Best response</b>      | PR                | PR                | SD                |
| <b>PFS</b>                | More than 2 years | 6 months          | 4 months          |
| <b>MHC class I</b>        | Positive          | Positive          | Negative          |
| <b>MHC class II</b>       | Positive          | Positive          | Positive          |
| <b>CD4</b>                | 750               | 493.8             | 137.6             |
| <b>CD8</b>                | 337.4             | 125               | 193.8             |
| <b>FOXP3</b>              | 62.6              | 106.2             | 31.2              |
| <b>PD-L1</b>              | Positive          | Positive          | Positive          |

PR, partial response; SD, stable disease; PFS, progression-free survival.
